# Supplementary material for: In-Silico Evaluation of Genetic Alterations in Ovarian Carcinoma and Therapeutic Efficacy of NSC777201, as a Novel Multi-Target Agent for TTK, NEK2, and CDK1
Source: MDPI journal article supplement (doi:10.3390/ijms22115895), 2021-05-31
Supplement: s1 [file s1]

| <b>Table S1.</b>  | <b>The common upregulated gene signature in ovarian cancer and gene FC values.</b> |            |             |             |              |
|-------------------|------------------------------------------------------------------------------------|------------|-------------|-------------|--------------|
|                   | GSE18520                                                                           | GSE26712   | GSE54388    | GSE14407    | Average FC   |
| <b>CKS1B</b>      | 1.5035113                                                                          | 1.5564532  | 2.41202543  | 1.54846723  | 1.75511429   |
| <b>KRT17</b>      | 1.5232635                                                                          | 1.5638609  | 1.57988719  | 1.50876206  | 1.543943413  |
| <b>CLDN7</b>      | 1.5482503                                                                          | 1.8133206  | 1.81529316  | 1.93106687  | 1.776982733  |
| <b>LSM4</b>       | 1.576591                                                                           | 2.2202434  | 2.14587955  | 1.61180081  | 1.88862869   |
| <b>PTTG1</b>      | 1.5851681                                                                          | 1.7241335  | 2.53092828  | 2.81618777  | 2.164104413  |
| <b>ASS1</b>       | 1.5863852                                                                          | 1.7809022  | 2.26650699  | 2.5761963   | 2.052497673  |
| <b>UCP2</b>       | 1.5886987                                                                          | 1.9341559  | 2.79684603  | 2.45453011  | 2.193557685  |
| <b>HIST2H2AA4</b> | 1.6037393                                                                          | 3.8132994  | 1.57163767  | 1.92279805  | 2.227868605  |
| <b>GALNT6</b>     | 1.6283555                                                                          | 1.5639289  | 1.89393225  | 2.2184833   | 1.826174988  |
| <b>SPON1</b>      | 1.6343724                                                                          | 1.7557265  | 2.61555009  | 5.11917689  | 2.78120647   |
| <b>CDKN2A</b>     | 1.6582585                                                                          | 1.8668662  | 1.56889283  | 4.87824132  | 2.493064713  |
| <b>TNNT1</b>      | 1.7120016                                                                          | 1.7248377  | 2.59199335  | 2.90556476  | 2.233599353  |
| <b>IFI27</b>      | 1.7304991                                                                          | 2.0389137  | 2.42325374  | 1.53066183  | 1.930832093  |
| <b>CXCR4</b>      | 1.7323896                                                                          | 1.5529248  | 3.09185858  | 2.61428996  | 2.247865735  |
| <b>CCNE1</b>      | 1.8135302                                                                          | 1.727517   | 1.8645167   | 3.70945345  | 2.278754338  |
| <b>GINS1</b>      | 1.8504189                                                                          | 1.5347887  | 3.28216941  | 2.22135516  | 2.222183043  |
| <b>SLC39A4</b>    | 1.8591187                                                                          | 2.042175   | 2.22964269  | 1.84784703  | 1.994695855  |
| <b>ADGRG1</b>     | 1.8736437                                                                          | 2.2297834  | 2.77079181  | 3.66756572  | 2.635446158  |
| <b>VTCN1</b>      | 1.8750525                                                                          | 1.5188603  | 2.55932736  | 1.91721732  | 1.96761437   |
| <b>RACGAP1</b>    | 1.889408                                                                           | 1.6151755  | 2.61099198  | 2.38066859  | 2.124061018  |
| <b>HIST1H1C</b>   | 2.0136981                                                                          | 2.0258376  | 2.3777018   | 2.18210599  | 2.149835873  |
| <b>UBE2C</b>      | 2.0259988                                                                          | 2.1169556  | 2.27206271  | 2.53923324  | 2.238562588  |
| <b>PFKP</b>       | 2.0560559                                                                          | 1.5970903  | 2.92923891  | 1.69037224  | 2.068189338  |
| <b>SORT1</b>      | 2.0706019                                                                          | 1.7272631  | 2.19047725  | 3.18517285  | 2.293378775  |
| <b>MTHFD2</b>     | 2.0761211                                                                          | 1.855699   | 3.43802822  | 2.96200561  | 2.582963483  |
| <b>SCGB1D2</b>    | 2.1014059                                                                          | 1.9011465  | 1.87980413  | 2.36715655  | 2.06237827   |
| <b>S100A13</b>    | 2.1201662                                                                          | 2.6353998  | 2.12671922  | 2.11842323  | 2.250177113  |
| <b>SLC52A2</b>    | 2.1858062                                                                          | 2.5925358  | 1.58759595  | 2.79062935  | 2.289141825  |
| <b>CLDN4</b>      | 2.1874141                                                                          | 2.1017913  | 2.87235227  | 2.05624714  | 2.304451203  |
| <b>IDH2</b>       | 2.1961069                                                                          | 2.0583116  | 3.24694425  | 1.51743071  | 2.254698365  |
| <b>TRIP13</b>     | 2.2153919                                                                          | 1.7864702  | 3.80169245  | 2.77658013  | 2.64503367   |
| <b>SST</b>        | 2.2553965                                                                          | 1.6702669  | 2.7368555   | 3.61622586  | 2.56968619   |
| <b>PAX8</b>       | 2.2673437                                                                          | 1.9338173  | 1.87104122  | 2.72704711  | 2.199812333  |
| <b>DEFB1</b>      | 2.295469                                                                           | 2.541294   | 3.17608453  | 3.50199123  | 2.87870969   |
| <b>CKS2</b>       | 2.3528225                                                                          | 2.362744   | 3.25360268  | 2.86869791  | 2.709466773  |
| <b>KIAA0101</b>   | 2.3755858                                                                          | 1.5843077  | 3.3531618   | 3.0426095   | 2.5889162    |
| <b>MUC1</b>       | 2.4182557                                                                          | 2.9103658  | 3.71077769  | 5.00959119  | 3.512247595  |
| <b>KLK8</b>       | 2.436599                                                                           | 2.031964   | 2.84211498  | 3.31858194  | 2.65731498   |
| <b>TOP2A</b>      | 2.4917396                                                                          | 1.7114638  | 3.90640641  | 3.15280703  | 2.81560421   |
| <b>DDX17</b>      | 2.5173586                                                                          | -2.8884915 | -3.00669809 | -1.85887144 | -1.309175608 |
| <b>CLDN10</b>     | 2.5491458                                                                          | 1.570669   | 2.32710887  | 1.61025382  | 2.014294373  |
| <b>LCN2</b>       | 2.5508985                                                                          | 2.5979465  | 2.63279129  | 2.60555165  | 2.596796985  |
| <b>SOX9</b>       | 2.5661536                                                                          | 2.2188302  | 3.06109474  | 2.47479424  | 2.580218195  |
| <b>GLDC</b>       | 2.5982669                                                                          | 1.8639102  | 2.25822023  | 4.01894894  | 2.684836568  |
| <b>CRABP2</b>     | 2.6030514                                                                          | 3.3120457  | 3.75504242  | 2.09301216  | 2.94078792   |
| <b>EPCAM</b>      | 2.6076583                                                                          | 1.9374149  | 3.91796973  | 2.90958647  | 2.84315735   |

|                     |           |           |            |            |             |
|---------------------|-----------|-----------|------------|------------|-------------|
| <b>CDC20</b>        | 2.629348  | 2.0688945 | 2.67333309 | 2.44011922 | 2.452923703 |
| <b>RGS1</b>         | 2.6920854 | 1.6183767 | 2.94789518 | 3.20990236 | 2.61706491  |
| <b>ELF3</b>         | 2.7166184 | 2.6216772 | 3.4397343  | 3.20214881 | 2.995044678 |
| <b>S100A2</b>       | 2.7391937 | 2.4057574 | 2.52216025 | 3.78688002 | 2.863497843 |
| <b>C1orf106</b>     | 2.7471391 | 2.0594274 | 3.22704702 | 3.2938179  | 2.831857855 |
| <b>INHBB</b>        | 2.7672152 | 1.5396394 | 1.72120248 | 2.28741927 | 2.078869088 |
| <b>CDK1</b>         | 2.7712418 | 1.558293  | 4.24011987 | 2.55175108 | 2.780351438 |
| <b>PRAME</b>        | 2.8031508 | 1.7097868 | 2.84741732 | 4.11650071 | 2.869213908 |
| <b>KLK6</b>         | 2.8093839 | 2.5609309 | 3.9628796  | 2.39721001 | 2.932601103 |
| <b>TTK</b>          | 2.8357612 | 1.727283  | 3.5955271  | 3.14724284 | 2.826453535 |
| <b>LYPD1</b>        | 3.0058514 | 2.0988132 | 3.78894049 | 3.14999875 | 3.01090096  |
| <b>MAL</b>          | 3.0796118 | 1.9481591 | 3.39921118 | 4.60962458 | 3.259151665 |
| <b>FXD3</b>         | 3.0898327 | 2.127299  | 1.59995322 | 1.71196547 | 2.132262598 |
| <b>FOXN1</b>        | 3.2642259 | 1.6858633 | 2.47867993 | 2.86265696 | 2.572856523 |
| <b>WFDC2</b>        | 3.2909179 | 3.6042786 | 3.74623999 | 3.17675115 | 3.45454691  |
| <b>NEK2</b>         | 3.3192172 | 1.8704568 | 4.11000516 | 3.12679342 | 3.106618145 |
| <b>FOLR1</b>        | 3.553973  | 3.4741996 | 4.26986154 | 3.82733819 | 3.781343083 |
| <b>CLDN3</b>        | 3.6653647 | 2.7608509 | 4.34375773 | 2.80673374 | 3.394176768 |
| <b>MMP7</b>         | 3.8098733 | 2.1593555 | 4.5903028  | 3.09040775 | 3.412484838 |
| <b>SOX17</b>        | 3.8447394 | 3.0739197 | 4.66537404 | 5.25235079 | 4.209095983 |
| <b>CP</b>           | 3.8582713 | 2.3290776 | 5.50114568 | 5.53471225 | 4.305801708 |
| <b>LOC101929219</b> | 3.9232044 | 3.8807065 | 4.5350819  | 3.72002537 | 4.014754543 |
| <b>SCGB2A1</b>      | 4.6035392 | 3.5918179 | 4.57503223 | 2.97618963 | 3.93664474  |
| <b>HMGA1</b>        | 4.7378028 | 2.4695224 | 2.38238349 | 3.32207276 | 3.227945363 |
| <b>MECOM</b>        | 4.9760337 | 2.8703197 | 6.5092766  | 4.93259787 | 4.822056968 |
| <b>CD24</b>         | 5.8941727 | 4.3455616 | 5.94921647 | 4.06978934 | 5.064685028 |

Common downregulated DEGs: adjusted p-value < 0.05 and log fold change (FC) > 1.5

| Table S2.    | The common downregulated gene signature in ovarian cancer and gene FC values. |            |             |             |              |
|--------------|-------------------------------------------------------------------------------|------------|-------------|-------------|--------------|
|              | GSE18520                                                                      | GSE26712   | GSE54388    | GSE14407    | Average FC   |
| ADH1B        | -5.7689581                                                                    | -3.5281206 | -5.3828649  | -5.80156146 | -5.120376265 |
| BCHE         | -5.1106175                                                                    | -4.4300515 | -5.57631282 | -5.51658163 | -5.158390863 |
| ABCA8        | -5.0699307                                                                    | -4.167755  | -6.96328264 | -6.42840621 | -5.657343638 |
| MEOX2        | -5.0493452                                                                    | -1.6499411 | -2.95841772 | -4.36060991 | -3.504578483 |
| NPY1R        | -4.8848776                                                                    | -3.6719391 | -5.26073126 | -3.49384941 | -4.327849343 |
| AOX1         | -4.7958022                                                                    | -4.225605  | -2.24233008 | -4.90599851 | -4.042433948 |
| BNC1         | -4.7909113                                                                    | -3.7299279 | -6.09482574 | -7.10951987 | -5.431296203 |
| REEP1        | -4.6773319                                                                    | -3.9476068 | -4.96730013 | -5.88106708 | -4.868326478 |
| HBB          | -4.6708376                                                                    | -4.098042  | -6.16593334 | -7.13317592 | -5.516997215 |
| OGN          | -4.6253585                                                                    | -2.3691737 | -5.69189394 | -6.56325754 | -4.81242092  |
| LOC101928635 | -4.5466848                                                                    | -4.36511   | -4.92487227 | -8.00200421 | -5.45966782  |
| TMEM255A     | -4.5009466                                                                    | -3.3276946 | -3.91908094 | -4.24674475 | -3.998616723 |
| EFEMP1       | -4.4229358                                                                    | -3.8974165 | -4.60273709 | -4.96720795 | -4.472574335 |
| TCF21        | -4.3466745                                                                    | -2.3007954 | -3.74501827 | -3.94867812 | -3.585291573 |
| DIRAS3       | -4.0892636                                                                    | -2.7786717 | -4.73425672 | -2.28874098 | -3.47273325  |
| SLC4A4       | -4.0699488                                                                    | -3.6705102 | -4.73585685 | -4.59918334 | -4.268874798 |

|              |            |            |             |             |              |
|--------------|------------|------------|-------------|-------------|--------------|
| MNDA         | -4.0376835 | -4.4397401 | -4.60843391 | -3.54734023 | -4.158299435 |
| SPOCK1       | -4.0214031 | -3.2039716 | -4.2052485  | -4.82941626 | -4.065009865 |
| RNF128       | -4.0039641 | -1.7183562 | -3.95217824 | -3.44529379 | -3.279948083 |
| MAF          | -3.9921298 | -3.1844745 | -4.16248842 | -2.0688948  | -3.35199688  |
| PROCR        | -3.988991  | -3.4770387 | -3.79514362 | -2.9635651  | -3.556184605 |
| MS4A4A       | -3.9786197 | -1.9668183 | -1.80516399 | -1.50624573 | -2.31421193  |
| PKD2         | -3.9168222 | -2.204135  | -2.36851297 | -2.15975628 | -2.662306613 |
| LOC101930363 | -3.9135661 | -4.6619823 | -4.77908792 | -4.26894378 | -4.405895025 |
| HBA2         | -4.1059935 | -3.5716722 | -3.54885038 | -5.62094873 | -4.211866203 |
| PRG4         | -3.8413263 | -2.9544698 | -5.12172703 | -5.48447143 | -4.35049864  |
| TCEAL2       | -3.8054457 | -4.0664253 | -5.52578156 | -4.51920071 | -4.479213318 |
| HAS1         | -3.7968813 | -2.0272248 | -3.1309992  | -1.91658994 | -2.71792381  |
| CHRD1        | -3.7841946 | -3.614563  | -4.00264759 | -5.4232821  | -4.206171823 |
| PCOLCE2      | -3.7725582 | -2.225823  | -2.66151977 | -2.74261986 | -2.850630208 |
| GPM6A        | -3.6705417 | -3.8586356 | -3.88307951 | -4.83692642 | -4.062295808 |
| METTL7A      | -3.6571823 | -2.5568076 | -1.62707612 | -3.18563414 | -2.75667504  |
| WNT2B        | -3.6521153 | -2.667646  | -5.89187918 | -5.93037063 | -4.535502778 |
| CHGB         | -3.6120564 | -2.0739057 | -3.89881556 | -3.17849533 | -3.190818248 |
| HBG2         | -3.6047161 | -2.4523458 | -1.6606096  | -4.12785608 | -2.961381895 |
| PTGER3       | -3.5877389 | -1.9384261 | -3.36163675 | -2.7321125  | -2.904978563 |
| LGALS8       | -3.5532435 | -3.2684735 | -1.82345085 | -2.80145869 | -2.861656635 |
| GHR          | -3.5307382 | -2.5214713 | -3.88025766 | -3.35998722 | -3.323113595 |
| NKX3-1       | -3.4605137 | -2.5772292 | -3.29539649 | -3.87431786 | -3.301864313 |
| PTPRZ1       | -3.4468394 | -1.5675705 | -2.42560509 | -3.5199432  | -2.739989548 |
| CSGALNACT1   | -3.4272192 | -2.3194621 | -3.40385698 | -4.01198779 | -3.290631518 |
| LOC100506718 | -3.3823064 | -1.9763368 | -3.14091209 | -3.83600071 | -3.083889    |
| PTPN13       | -3.3714943 | -1.5636582 | -1.79438582 | -1.65181362 | -2.095337985 |
| ANXA8L1      | -3.3327289 | -3.4003146 | -3.92543041 | -4.96028156 | -3.904688868 |
| LHX2         | -3.3193626 | -3.7502874 | -5.36122155 | -6.39499766 | -4.706467303 |
| PDGFD        | -3.2730175 | -2.9978876 | -3.92962725 | -4.58076949 | -3.69532546  |
| TSPAN8       | -3.2563743 | -2.2687633 | -4.00737502 | -2.86283953 | -3.098838038 |
| DFNA5        | -3.2550773 | -3.3406929 | -3.76671645 | -3.40760806 | -3.442523678 |
| CLEC4M       | -3.7083967 | -2.4698838 | -4.17337639 | -3.43725993 | -3.447229205 |
| LGALS2       | -3.223351  | -2.1992862 | -2.95543194 | -4.80514857 | -3.295804428 |
| SFRP1        | -3.2206553 | -3.1809029 | -3.63235441 | -5.88642216 | -3.980083693 |
| DPYD         | -3.2144845 | -3.7205607 | -3.42276345 | -3.63476051 | -3.49814229  |
| PMP22        | -3.1827726 | -1.7615297 | -2.42194004 | -3.4835449  | -2.71244681  |
| PEG3         | -3.1772001 | -3.1552952 | -3.40330699 | -3.57268559 | -3.32712197  |
| TFPI         | -3.1569535 | -1.8621495 | -2.57695366 | -2.89318908 | -2.622311435 |
| DCN          | -3.1257613 | -2.1511781 | -2.2531398  | -4.90639447 | -3.109118418 |
| HSD17B6      | -3.0608702 | -1.5735179 | -2.0674626  | -2.03414089 | -2.183997898 |
| GFPT2        | -3.0527749 | -2.2455099 | -2.83074799 | -4.12102703 | -3.062514955 |
| KDR          | -3.0295542 | -3.1167568 | -4.0369898  | -1.85058766 | -3.008472115 |
| DSC3         | -3.0171774 | -2.2612733 | -1.83174524 | -4.61968473 | -2.932470168 |
| NAP1L3       | -3.0133026 | -3.28136   | -3.70219777 | -2.98685917 | -3.245929885 |
| ZFPM2        | -3.0013691 | -2.7590526 | -2.46205136 | -2.94956776 | -2.793010205 |
| MARCO        | -2.9981814 | -2.7049442 | -2.31924981 | -2.95761146 | -2.744996718 |
| ALDH1A1      | -2.9272267 | -2.7791164 | -4.07699112 | -2.48179951 | -3.066283433 |

|              |            |            |             |             |              |
|--------------|------------|------------|-------------|-------------|--------------|
| PLCE1        | -2.9233592 | -2.227662  | -2.55483729 | -2.90147016 | -2.651832163 |
| CMAHP        | -2.9222435 | -1.6204149 | -2.91980654 | -2.45316592 | -2.478907715 |
| PDE8B        | -2.8514563 | -2.3989605 | -4.12332578 | -3.81593542 | -3.2974195   |
| LOC101926921 | -2.873467  | -2.8992213 | -3.80844961 | -3.10960613 | -3.17268601  |
| TFPI2        | -2.8560032 | -3.0690163 | -1.95208238 | -4.39322888 | -3.06758269  |
| CLDN15       | -2.8076187 | -2.2505559 | -2.8454579  | -2.62286443 | -2.631624233 |
| AKT3         | -2.8058384 | -1.7705263 | -1.96869667 | -2.44181334 | -2.246718678 |
| FGF13        | -2.8025683 | -2.7593924 | -3.06727065 | -3.68852571 | -3.079439265 |
| ECM2         | -2.7943268 | -2.5634693 | -3.57275345 | -2.67636103 | -2.901727645 |
| LAMA4        | -2.7828376 | -2.7142826 | -3.48599898 | -2.35888682 | -2.8355015   |
| NELL2        | -2.7818707 | -3.6844362 | -3.50380464 | -4.86403691 | -3.708537113 |
| CAV1         | -2.7796538 | -2.8699554 | -2.84038132 | -3.20605073 | -2.924010313 |
| RARRES1      | -2.7719759 | -2.0155122 | -3.6526643  | -5.04666439 | -3.371704198 |
| SNCAIP       | -2.7626101 | -2.6950327 | -3.0757177  | -3.0251148  | -2.889618825 |
| NBR1         | -2.7500152 | -1.9142875 | -1.70025683 | -2.49524544 | -2.214951243 |
| AQP9         | -2.7246993 | -2.729174  | -2.67301937 | -4.29389584 | -3.105197128 |
| CALB2        | -2.685319  | -3.8984394 | -3.9595774  | -3.57006268 | -3.52834962  |
| GPRASP1      | -2.6799383 | -2.3153749 | -3.94997008 | -2.71393586 | -2.914804785 |
| FLRT3        | -2.6744304 | -2.2627885 | -2.90402592 | -2.8416682  | -2.670728255 |
| THBD         | -2.6519397 | -1.6788064 | -3.7289014  | -2.48790765 | -2.636888788 |
| EZR          | -2.5838277 | -2.0105635 | -2.47846167 | -1.97725397 | -2.26252671  |
| ADAMTS3      | -2.5670983 | -2.1379239 | -2.23863392 | -2.24608338 | -2.297434875 |
| PITPNC1      | -2.5650602 | -1.6005441 | -2.16089765 | -3.49057977 | -2.45427043  |
| FRY          | -2.5631801 | -3.1025089 | -3.3120786  | -3.2486448  | -3.0566031   |
| CFH          | -2.5430897 | -2.265457  | -3.51303448 | -3.57782058 | -2.97485044  |
| CYP39A1      | -2.5317523 | -1.9543535 | -3.04317984 | -2.66135773 | -2.547660843 |
| FGF9         | -2.528293  | -2.4197006 | -2.89533577 | -4.88263448 | -3.181490963 |
| PAPSS2       | -2.522264  | -1.6802825 | -3.13367323 | -2.99172212 | -2.581985463 |
| SEMA5A       | -2.5121815 | -2.2633663 | -2.24426599 | -3.16810505 | -2.54697971  |
| MTUS1        | -2.5005844 | -1.8706449 | -1.80705218 | -3.18640054 | -2.341170505 |
| DST          | -2.4933966 | -1.5901907 | -2.4785004  | -2.30328867 | -2.216344093 |
| PTGDR        | -2.484622  | -1.7212115 | -3.14642929 | -2.99651533 | -2.58719453  |
| IL18         | -2.4784675 | -1.9172985 | -2.88760401 | -2.9316339  | -2.553750978 |
| MDFIC        | -2.4721966 | -1.7869615 | -2.02952015 | -2.22918803 | -2.12946657  |
| RUNX1T1      | -2.454723  | -1.694563  | -2.90837196 | -2.70260195 | -2.440064978 |
| LY75-CD302   | -2.447611  | -1.7113087 | -2.49229138 | -2.03982106 | -2.172758035 |
| ME1          | -2.4400698 | -2.2779682 | -2.61370455 | -1.99017908 | -2.330480408 |
| CFI          | -2.4308269 | -2.5887773 | -2.8740432  | -2.24252105 | -2.534042113 |
| CFHR1        | -2.4216438 | -2.3519407 | -2.98851954 | -3.16226855 | -2.731093148 |
| OLFML1       | -2.411794  | -2.4423333 | -3.44400126 | -2.86059574 | -2.789681075 |
| RGS4         | -2.3894472 | -2.8681307 | -3.45284006 | -4.34521394 | -3.263907975 |
| SNCA         | -2.3562038 | -1.8337609 | -2.62146302 | -3.75422659 | -2.641413578 |
| BAMBI        | -2.3550641 | -2.0492038 | -2.7974974  | -2.76162914 | -2.49084861  |
| RNASE4       | -2.3550401 | -2.9258476 | -3.12436782 | -4.35890658 | -3.191040525 |
| RTN1         | -2.3487017 | -2.9487552 | -3.68654278 | -3.28499012 | -3.06724745  |
| PCDH9        | -2.33076   | -2.2026314 | -3.32238812 | -3.55331261 | -2.852273033 |
| SOBP         | -2.3251738 | -2.2668254 | -2.7876694  | -1.93424398 | -2.328478145 |
| FAM134B      | -2.3181214 | -1.6977143 | -2.00125745 | -2.25912274 | -2.069053973 |

|          |            |            |             |             |              |
|----------|------------|------------|-------------|-------------|--------------|
| NBEA     | -2.3137808 | -1.7971695 | -2.13429397 | -3.21837491 | -2.365904795 |
| PROS1    | -2.3024784 | -3.3456003 | -2.6693135  | -2.80470146 | -2.780523415 |
| TLE4     | -2.3003883 | -2.3826089 | -2.37828986 | -3.14254374 | -2.5509577   |
| PDZD2    | -2.272068  | -2.0424062 | -2.30637125 | -1.87307652 | -2.123480493 |
| DSE      | -2.2704122 | -3.0794871 | -2.56603839 | -2.72775832 | -2.660924003 |
| MAP3K8   | -2.2229769 | -2.1568196 | -2.37106844 | -1.93772264 | -2.172146895 |
| WNT5A    | -2.213879  | -2.7865746 | -2.64793195 | -2.3590869  | -2.501868113 |
| ATP10D   | -2.1956486 | -2.2716214 | -2.3393752  | -1.97011496 | -2.19419004  |
| NR2F1    | -2.1910427 | -2.6901325 | -3.26385347 | -1.61296625 | -2.43949873  |
| TRPC1    | -2.1875945 | -2.4760254 | -2.273646   | -3.04079459 | -2.494515123 |
| GAS1     | -2.1755669 | -2.7071004 | -2.31248411 | -2.70266651 | -2.47445448  |
| GATA6    | -2.1750218 | -2.8642411 | -3.23843398 | -3.5061217  | -2.945954645 |
| PRKAR2B  | -2.1636952 | -2.1382866 | -2.67385168 | -3.43492415 | -2.602689408 |
| NDN      | -2.1599629 | -1.7096975 | -2.25406741 | -3.58742816 | -2.427788993 |
| KLF4     | -2.1598107 | -2.2234175 | -2.29688231 | -2.17010795 | -2.212554615 |
| SVEP1    | -2.1557503 | -1.9123177 | -2.67048001 | -2.99566033 | -2.433552085 |
| NR3C1    | -2.1550624 | -1.5743244 | -2.05492202 | -1.76058681 | -1.886223908 |
| BDH2     | -2.1447209 | -1.5553481 | -1.9247253  | -2.42635001 | -2.012786078 |
| STK26    | -2.130086  | -3.9748483 | -2.15872108 | -2.74393067 | -2.751896513 |
| NEFH     | -2.1128637 | -1.659517  | -3.42381321 | -3.62072264 | -2.704229138 |
| ARHGAP44 | -2.1064333 | -2.2321754 | -1.57111022 | -2.88151447 | -2.197808348 |
| MEIS2    | -2.0901766 | -3.0521864 | -2.9243863  | -2.63055437 | -2.674325918 |
| NT5E     | -2.0898327 | -1.7522724 | -2.24618672 | -2.41273501 | -2.125256708 |
| DMD      | -2.0594746 | -2.6265138 | -2.87924471 | -2.52626101 | -2.52287353  |
| HSD17B2  | -2.0541438 | -1.695097  | -3.22911842 | -4.38080171 | -2.839790233 |
| NRXN3    | -2.0483808 | -1.8797824 | -1.88267886 | -2.21371837 | -2.006140108 |
| CELF2    | -2.0265593 | -1.8941702 | -1.78085663 | -2.76314027 | -2.1161816   |
| S100A8   | -2.0139143 | -1.9505706 | -2.49715726 | -3.47703517 | -2.484669333 |
| NLGN4X   | -2.0123171 | -1.5507078 | -3.01931956 | -3.27891271 | -2.465314293 |
| FAM65B   | -1.9934088 | -1.741029  | -2.03725701 | -2.89857133 | -2.167566535 |
| PDPN     | -1.9811827 | -2.1431935 | -2.40020889 | -2.07143389 | -2.149004745 |
| PTGIS    | -1.9727192 | -2.6032643 | -4.13608951 | -3.6092443  | -3.080329328 |
| PDGFRA   | -1.946443  | -1.877806  | -3.12885339 | -2.66716368 | -2.405066518 |
| SLC16A1  | -1.9395554 | -1.7375157 | -1.64052501 | -2.27683985 | -1.89860899  |
| RUFY3    | -1.9307561 | -1.9798619 | -2.37664168 | -1.63699689 | -1.981064143 |
| TSPYL1   | -1.9214133 | -2.158204  | -1.60361875 | -1.86267603 | -1.88647802  |
| MAOA     | -1.9143216 | -1.5146756 | -2.51169302 | -2.77731105 | -2.179500318 |
| MEF2C    | -1.9134633 | -2.0122845 | -2.17613266 | -2.15041217 | -2.063073158 |
| GREB1    | -1.9057264 | -2.6941656 | -2.18580463 | -1.90860608 | -2.173575678 |
| TPBG     | -1.8871181 | -1.9648569 | -1.85990795 | -3.06432424 | -2.194051798 |
| SLC39A8  | -1.8733146 | -3.6203723 | -1.6618424  | -2.96287738 | -2.52960167  |
| HPR      | -1.8485719 | -2.1899093 | -1.6827256  | -2.57977173 | -2.075244633 |
| WASF3    | -1.8444519 | -1.574059  | -1.94139144 | -1.88145675 | -1.810339773 |
| CAV2     | -1.8361671 | -2.213583  | -2.67598618 | -3.95632092 | -2.6705143   |
| C21orf62 | -1.8321227 | -2.1125561 | -2.37297825 | -4.4410803  | -2.689684338 |
| SCG5     | -1.8269467 | -2.758728  | -2.17113737 | -2.77410335 | -2.382728855 |
| PLSCR4   | -1.8267321 | -3.3925309 | -2.22180416 | -3.39076702 | -2.707958545 |
| ARHGEF10 | -1.8115547 | -1.5518986 | -1.62415165 | -1.88365898 | -1.717815983 |

|           |            |            |             |             |              |
|-----------|------------|------------|-------------|-------------|--------------|
| HSPA2     | -1.8084577 | -1.7776543 | -1.88411749 | -1.87549267 | -1.83643054  |
| LEPROT    | -1.7750975 | -1.5226618 | -2.36066818 | -1.61660988 | -1.81875934  |
| HNMT      | -1.7717997 | -1.6061011 | -2.2034673  | 1.67026711  | -0.977775248 |
| GNG11     | -1.7513487 | -2.1442506 | -2.09791818 | -2.41020412 | -2.1009304   |
| ABHD11    | -1.7447011 | 1.9988828  | 2.40174553  | 1.55047269  | 1.05159998   |
| TACC1     | -1.7071604 | -2.5505833 | -1.92230942 | -3.79557497 | -2.493907023 |
| ANOS1     | -1.6835518 | -2.1989315 | -1.81321328 | -2.05974327 | -1.938859963 |
| LAMB1     | -1.6809285 | -2.2348326 | -1.7171636  | -1.67354923 | -1.826618483 |
| TNXB      | -1.666131  | -1.5553633 | -2.49408056 | -2.07824889 | -1.948455938 |
| ARMCX1    | -1.6660126 | -3.4513774 | -1.93375991 | -2.206937   | -2.314521728 |
| CPE       | -1.6601362 | -2.5219973 | -2.62433233 | -2.87113103 | -2.419399215 |
| BCL2      | -1.6570289 | -1.9702963 | -1.98492107 | -3.34831023 | -2.240139125 |
| TXNIP     | -1.6547952 | -1.8583254 | -2.29506141 | -4.08618642 | -2.473592108 |
| FHL1      | -1.6545908 | -1.8468289 | -1.91331545 | -2.34821719 | -1.940738085 |
| QKI       | -1.6518229 | -2.573701  | -1.57605812 | -1.59709774 | -1.84966994  |
| TMX4      | -1.6488609 | -2.7922047 | -1.66726559 | -2.07412248 | -2.045613418 |
| PHLPP2    | -1.6465789 | -1.9356768 | -1.93691178 | -2.73297622 | -2.063035925 |
| SLC31A2   | -1.6416207 | -1.8139472 | -1.657694   | -2.66315406 | -1.94410399  |
| SMARCA2   | -1.6357337 | -2.0729893 | -1.5694402  | -3.59659497 | -2.218689543 |
| HEG1      | -1.6332696 | -3.147903  | -1.63038451 | -1.68617762 | -2.024433683 |
| N4BP2L2   | -1.6325208 | -2.8265002 | -2.23064322 | -3.60373773 | -2.573350488 |
| RECK      | -1.6248593 | -2.3871977 | -2.97165138 | -1.57672744 | -2.140108955 |
| TRA2A     | -1.6020422 | -1.7861149 | -2.37089855 | 2.28990871  | -0.867286735 |
| MAN1A1    | -1.6004038 | -1.9273587 | -2.20307298 | -1.6420505  | -1.843221495 |
| AMIGO2    | -1.5680417 | -2.7964589 | -1.7096788  | -2.75485993 | -2.207259833 |
| SEMA3C    | -1.5606831 | -2.5230971 | -2.36095918 | -3.85921819 | -2.575989393 |
| PDLIM5    | -1.5490674 | -1.6840456 | -1.56661365 | -2.00239726 | -1.700530978 |
| NDNF      | -1.5400828 | -1.7955413 | -2.89853529 | -3.99193984 | -2.556524808 |
| LOC728392 | -1.5368559 | -1.7369442 | -1.73969752 | -2.03452578 | -1.76200585  |
| SERPINB9  | -1.535668  | -2.134485  | -1.50665728 | -1.86124808 | -1.75951459  |
| GPR137B   | -1.514345  | -2.1528251 | -1.55942001 | -1.69627783 | -1.730716985 |

Common downregulated DEGs: adjusted p-value < 0.05 and log fold change (FC) > 1.5

| Table S3: Enriched KEGG Pathways |                                      |          |         |  |
|----------------------------------|--------------------------------------|----------|---------|--|
| #term ID                         | term description                     | strength | FDR     |  |
| hsa04110                         | Cell cycle                           | 1.12     | 0.00063 |  |
| hsa04670                         | Leukocyte transendothelial migration | 1.08     | 0.0028  |  |
| hsa04514                         | Cell adhesion molecules (CAMs)       | 0.99     | 0.005   |  |
| hsa04114                         | Oocyte meiosis                       | 0.97     | 0.0201  |  |
| hsa05160                         | Hepatitis C                          | 0.92     | 0.0248  |  |
| hsa04115                         | p53 signaling pathway                | 1.08     | 0.0305  |  |
| hsa01230                         | Biosynthesis of amino acids          | 1.05     | 0.0306  |  |
| hsa04218                         | Cellular senescence                  | 0.84     | 0.0306  |  |
| hsa04530                         | Tight junction                       | 0.81     | 0.0306  |  |
| hsa05200                         | Pathways in cancer                   | 0.57     | 0.0306  |  |
| hsa05203                         | Viral carcinogenesis                 | 0.77     | 0.0364  |  |
| hsa05222                         | Small cell lung cancer               | 0.95     | 0.0364  |  |

**Table S4: Enriched Gene Ontology (Biological Process)**

| #term ID   | term description                                                | strength | FDR     |
|------------|-----------------------------------------------------------------|----------|---------|
| GO:2000241 | regulation of reproductive process                              | 1.02     | 0.0016  |
| GO:0007292 | female gamete generation                                        | 0.94     | 0.0176  |
| GO:0001824 | blastocyst development                                          | 1.25     | 0.0036  |
| GO:0007143 | female meiotic nuclear division                                 | 1.46     | 0.0056  |
| GO:0032268 | regulation of cellular protein metabolic process                | 0.36     | 0.0052  |
| GO:0042493 | response to drug                                                | 0.52     | 0.0094  |
| GO:0002376 | immune system process                                           | 0.29     | 0.0413  |
| GO:0044703 | multi-organism reproductive process                             | 0.62     | 0.00055 |
| GO:0019953 | sexual reproduction                                             | 0.59     | 0.0039  |
| GO:0030858 | positive regulation of epithelial cell differentiation          | 1.14     | 0.0188  |
| GO:0034501 | protein localization to kinetochore                             | 1.59     | 0.0188  |
| GO:0071599 | otic vesicle development                                        | 1.59     | 0.0188  |
| GO:0007568 | aging                                                           | 0.81     | 0.0082  |
| GO:0046655 | folic acid metabolic process                                    | 1.48     | 0.0261  |
| GO:0060429 | epithelium development                                          | 0.41     | 0.0428  |
| GO:0071902 | positive regulation of protein serine/threonine kinase activity | 0.68     | 0.0201  |
| GO:0009790 | embryo development                                              | 0.44     | 0.0434  |
| GO:0051983 | regulation of chromosome segregation                            | 1.23     | 0.00026 |
| GO:0051988 | regulation of attachment of spindle microtubules to kinetochore | 1.66     | 0.0164  |

**Table S5: ADMET, safety/toxicity and drug likeness profile of NSC777201**

| Properties                             | NSC777201        | Reference value                                    |
|----------------------------------------|------------------|----------------------------------------------------|
| Formula                                | C21H22CIN3O2S    | -                                                  |
| Molecular weight                       | 415.94 g/mol     | 150-500 g/mol                                      |
| Num. rotatable bonds                   | 7                | 0-9                                                |
| Num. H-bond acceptors                  | 4                | 0-10                                               |
| Num. H-bond donors                     | 3                | 0-5                                                |
| Molar Refractivity                     | 116.96           | -                                                  |
| TPSA                                   | 99.02 A2         | 20 to 130 A2                                       |
| Fraction Csp3                          | 0.33             | 0.25<1                                             |
| Log P o/w (XLOGP3)                     | 3.13             | minus 0.7 to 5                                     |
| Consensus Log P o/w                    | 3.3              | -                                                  |
| Log S (ESOL)                           | -4.25            | 0-6                                                |
| Lipinski, Ghose, Veber and Egan's rule | Yes, 0 violation | -                                                  |
| Bioavailability Score                  | 0.55             | >0.1 (10%)<br>1 (very easy) to 10 (very difficult) |
| Synthetic accessibility                | 4.57             |                                                    |

  

| Acute Toxicity                           |                  |  |
|------------------------------------------|------------------|--|
|                                          | 547,100 (OECD:   |  |
| LD50 for Intraperitoneal (mg/kg)         | 5)               |  |
| LD <sub>50</sub> for Intravenous (mg/kg) | 76,580 (OECD: 4) |  |
| LD <sub>50</sub> for Oral (mg/kg)        | 958,100 (OECD:   |  |
|                                          | 4)               |  |

LD<sub>50</sub> for Subcutaneous (mg/kg) 492,400 (OECD:  
4)

| Environmental Toxicity                                    |        |
|-----------------------------------------------------------|--------|
| Bioaccumulation factor Log10 (BCF)                        | 1,230  |
| Daphnia magna LC <sub>50</sub> Log10 (mol/L)              | 7,028  |
| Fathead Minnow LC <sub>50</sub> Log10 (mmol/L)            | -3,765 |
| Tetrahymena pyriformis IGC <sub>50</sub> Log10<br>(mol/L) | 1,732  |
